# Supplementary material
Source: PubMed Central journal article supplement (PMC3187525)
Supplement: supp_mol.111.072751_supplemental_material72751.pdf [file supp_mol.111.072751_supplemental_material72751.pdf]

Inhibition of Navβ4 peptide-mediated resurgent sodium currents in Nav1.7 channels by carbamazepine, riluzole and anandamide

Jonathan W. Theile and Theodore R. Cummins

*Molecular Pharmacology*

**Supplemental Table 1. Decay time constant and voltage-dependence of steady-state fast inactivation for PEPD Nav1.7 channels.**

|                   | $\tau_h$ (ms) <sup>a</sup> | $V_{1/2}$ inactivation (mV) <sup>b</sup> | <i>n</i> |
|-------------------|----------------------------|------------------------------------------|----------|
| <b>WT</b>         |                            |                                          |          |
| <i>Ctrl</i>       | 0.83 ± 0.09                | -55.2 ± 2.0                              | 5        |
| <i>CBZ 200 μm</i> | 0.67 ± 0.06*               | -67.1 ± 3.5*                             |          |
| <i>Ctrl</i>       | 0.90 ± 0.18                | -55.5 ± 3.7                              | 6        |
| <i>RZ 30 μm</i>   | 0.62 ± 0.06                | -83.4 ± 2.0*                             |          |
| <i>Ctrl</i>       | 0.64 ± 0.04                | -58.4 ± 0.5                              | 4        |
| <i>RZ 3 μm</i>    | 0.65 ± 0.07                | -65.0 ± 1.5*                             |          |
| <i>Ctrl</i>       | 0.74 ± 0.03                | -54.4 ± 1.1                              | 6        |
| <i>AEA 5 μM</i>   | 0.67 ± 0.03*               | -64.5 ± 2.7*                             |          |
| <i>Ctrl</i>       | 0.63 ± 0.03                | -57.7 ± 0.4                              | 5        |
| <i>AEA 500 nM</i> | 0.66 ± 0.04*               | -56.8 ± 0.7                              |          |
| <b>T1464I</b>     |                            |                                          |          |
| <i>Ctrl</i>       | 1.83 ± 0.08                | -43.9 ± 1.8                              | 6        |
| <i>CBZ 200 μm</i> | 1.71 ± 0.08                | -50.7 ± 2.5*                             |          |
| <i>Ctrl</i>       | 1.90 ± 0.13                | -48.6 ± 3.2                              | 5        |
| <i>RZ 30 μm</i>   | 1.27 ± 0.07*               | -68.4 ± 2.7*                             |          |
| <i>Ctrl</i>       | 2.02 ± 0.18                | -44.0 ± 0.8                              | 4        |
| <i>RZ 3 μm</i>    | 1.94 ± 0.24                | -47.0 ± 1.0*                             |          |
| <i>Ctrl</i>       | 1.96 ± 0.14                | -45.7 ± 1.3                              | 5        |
| <i>AEA 5 μM</i>   | 1.57 ± 0.12*               | -52.7 ± 1.2*                             |          |
| <i>Ctrl</i>       | 1.98 ± 0.08                | -45.8 ± 2.0                              | 5        |
| <i>AEA 500 nM</i> | 1.86 ± 0.11                | -45.5 ± 2.1                              |          |
| <b>M1627K</b>     |                            |                                          |          |
| <i>Ctrl</i>       | 2.23 ± 0.15                | -33.1 ± 1.9                              | 6        |
| <i>CBZ 200 μm</i> | 1.94 ± 0.08*               | -42.2 ± 1.9*                             |          |
| <i>Ctrl</i>       | 2.01 ± 0.25                | -35.9 ± 2.5                              | 6        |
| <i>RZ 30 μm</i>   | 1.36 ± 0.13*               | -65.1 ± 2.8*                             |          |
| <i>Ctrl</i>       | 2.07 ± 0.22                | -34.8 ± 1.3                              | 5        |
| <i>RZ 3 μm</i>    | 1.92 ± 0.18                | -41.5 ± 2.2*                             |          |
| <i>Ctrl</i>       | 2.22 ± 0.11                | -31.8 ± 1.5                              | 5        |
| <i>AEA 5 μM</i>   | 1.81 ± 0.07*               | -41.3 ± 1.7*                             |          |
| <i>Ctrl</i>       | 2.28 ± 0.11                | -32.9 ± 0.5                              | 4        |
| <i>AEA 500 nM</i> | 2.18 ± 0.05                | -33 ± 1.8                                |          |

<sup>a</sup>The decay time constant was measured using the transient current elicited at +20 mV and fit to a single-exponential. <sup>b</sup>The voltage dependence of steady-state fast inactivation was examined using a series of 200 ms conditioning pre-pulses from -120 mV to +30 mV, followed by a 20 ms test pulse to +15 mV to assess channel availability. The midpoint of activation was estimated by fitting the data with a Boltzmann function. \**p* < 0.05 from control by paired student's t-test.
